# Supplementary material
Source: MDPI journal article supplement (https://www.mdpi.com/2071-1050/15/15/11542)
Supplement: s1 [file s1]

**Supplementary file S2**  
**Table of strategies and criteria**

*List of abbreviations*

- DOC: Denominazione di Origine Controllata (controlled designation of origin) – Italian geographical indication for wines
- DOCG: Denominazione di Origine Controllata e Garantita (controlled and guaranteed designation of origin) – Italian geographical indication for wines
- LULC: Land Use/Land Cover
- MAV: Media and Alta Valtellina
- PDO: Protected Designation of Origin – European geographical indication for food products
- REN: Regional Ecological Network
- RGI: Regional Green Infrastructure
- RLP: Regional Landscape Plan
- RTAP: Regional Territorial Area Plan

| Key topics   | Thematic objectives                                                               | Strategic priority areas                                                                                                                                                                                                                                                                                                                                                                      | Spatial data and sources                                                                                                                                                                                                          | Selection and representation criteria                                                                                                                                                | Design solutions                                                                                                                                                                                                                                                                                                                                                                                                                                                                                                                                                                                                                                                                                                         |
|--------------|-----------------------------------------------------------------------------------|-----------------------------------------------------------------------------------------------------------------------------------------------------------------------------------------------------------------------------------------------------------------------------------------------------------------------------------------------------------------------------------------------|-----------------------------------------------------------------------------------------------------------------------------------------------------------------------------------------------------------------------------------|--------------------------------------------------------------------------------------------------------------------------------------------------------------------------------------|--------------------------------------------------------------------------------------------------------------------------------------------------------------------------------------------------------------------------------------------------------------------------------------------------------------------------------------------------------------------------------------------------------------------------------------------------------------------------------------------------------------------------------------------------------------------------------------------------------------------------------------------------------------------------------------------------------------------------|
| KT1_Identity | KT1a_Preserving unity and perceivability of hydro-geo-morphological elements      | Glaciers to be supervised and protected in order to tackle climate change impacts                                                                                                                                                                                                                                                                                                             | Regional LULC map                                                                                                                                                                                                                 | Representation of glaciers                                                                                                                                                           | _Placement of geotextile sheets                                                                                                                                                                                                                                                                                                                                                                                                                                                                                                                                                                                                                                                                                          |
|              |                                                                                   | Priority areas to tackle structural modifications and prevent risks on hydrographic network:<br><br>1. areas to safeguard of the river morphology and increase of the naturalistic values;<br><br>2. areas to prevent hydrological risk prevention and increase naturalistic values in urbanized context;<br><br>3. priority areas to prevent hydrological risk on minor hydrographic network | Regional LULC map; Hydrographic network; National map of hydrological instability areas                                                                                                                                           | Intersection between high hydrogeological instability areas and land uses; diversification of actions according to land uses and hydrological classification                         | _Maintenance of riparian areas with cleaning or replacement of decayed plants<br>_Increase of riparian vegetation to slow down runoff<br>_Reinstatement of flood plains by moving embankments back or reshaping river banks<br>_Supervised flooding of rural areas next to river banks<br>_Reactivation of river dynamics through removal of embankments or expansion of riverbeds<br>_Reshaping and restoration of the natural course of rivers and streams<br><br>_Desealing of urban soils<br>_Creation of retention basins<br>_Delocalization of buildings and infrastructures located next to rivers<br><br>_Riverine wood maintenance with supervised cutting<br>_Increase of morphological diversity of riverbeds |
|              |                                                                                   | Priority areas to prevent hydrogeological risk on mountain woodlands                                                                                                                                                                                                                                                                                                                          | Regional LULC map; National map of landslide hazard                                                                                                                                                                               | Selection of mountain woodlands exposed to high or very high landslide hazard                                                                                                        | _Changes in woodland management<br>_Prevention and control of soil erosion through renaturalization, grassing or stabilization of hydrographic network<br>_Wildfires prevention (e.g. bushes and fire break paths maintenance)                                                                                                                                                                                                                                                                                                                                                                                                                                                                                           |
|              |                                                                                   | Peculiar hydro-geo-morphological features to be preserved                                                                                                                                                                                                                                                                                                                                     | Regional geological heritage sites (geosites)                                                                                                                                                                                     | Punctual representation of geosite locations                                                                                                                                         | _Census and supervision of peculiar geological features<br>_Creation and maintenance of trails and paths                                                                                                                                                                                                                                                                                                                                                                                                                                                                                                                                                                                                                 |
|              |                                                                                   | High visibility mountain landscapes to be preserved                                                                                                                                                                                                                                                                                                                                           | Digital Terrain Model with 5 m resolution;<br>Panoramic viewpoints of regional, provincial or local relevance;<br>Adda river Greenway; panoramic paths and routes;<br>Photographic density hotspot from InVEST - Recreation model | Viewsheds derived from viewpoint sources; selection of high visibility areas based on Natural Breaks classification of raster values; vectorialization and merging of selected areas | _Preservation of viewpoints through limitations to building heights and rules for signage and billboards placement<br>_Limitation and mitigation of planned interventions which may alter the aspect of slopes<br>_Interventions for the improvement of panoramic paths and viewpoints                                                                                                                                                                                                                                                                                                                                                                                                                                   |
|              | KT1b_Preserving landscape values of natural elements                              | Priority areas to tackle vegetation diversity loss                                                                                                                                                                                                                                                                                                                                            | Regional LULC map; Forestry management plan for Alta Valtellina                                                                                                                                                                   | Selection of woodlands belonging to higher classes of vegetation diversity according to the Forestry management plan                                                                 | _Tackling the diffusion of dangerous alien species<br>_Reforestation of damaged woodlands                                                                                                                                                                                                                                                                                                                                                                                                                                                                                                                                                                                                                                |
|              | KT1c_Preserving constitutive features of rural landscape                          | Traditional and historical rural landscapes to be maintained, preserved and enhanced                                                                                                                                                                                                                                                                                                          | Regional and provincial LULC maps;<br>map of terraced areas; RGI                                                                                                                                                                  | Selection of rural and terraced areas within RGI cultural and historical multifunction reinforcement areas                                                                           | _Maintenance and preservation of dry stone walls in terraced areas and historical rural buildings<br>_Maintenance and recovery of meadows on valley floors (e.g. trimming of abandoned meadows, introduction of flower species)<br>_Maintenance and recovery of grassland and orchards (e.g. introduction of quality species, selective thinnings)                                                                                                                                                                                                                                                                                                                                                                       |
|              |                                                                                   | Priority areas where to tackle forest regrowth                                                                                                                                                                                                                                                                                                                                                | Regional LULC maps                                                                                                                                                                                                                | Detection of 1999-2018 land use change from stable meadows to woodlands; selection of meadows endangered by proximity to wood advance; simplified representation of high risk areas  | _Arrangement of pasture management plans to preserve pastures<br>_Supervised trimming and deforestation interventions in endangered areas<br>_Sustainable mowing in permanent meadows on valley floors                                                                                                                                                                                                                                                                                                                                                                                                                                                                                                                   |
|              |                                                                                   | Priority areas where to tackle abandon and degradation of croplands                                                                                                                                                                                                                                                                                                                           | Regional LULC maps                                                                                                                                                                                                                | Detection of 1999-2018 land use change from crop rotation areas to meadows or shrubland; simplified representation of detected areas                                                 | _Census and management of abandoned land through farmland banks<br>_Adoption of conservation agriculture methods to recover degraded soils                                                                                                                                                                                                                                                                                                                                                                                                                                                                                                                                                                               |
|              |                                                                                   | Alpine rural buildings to be restored, enhanced or preserved                                                                                                                                                                                                                                                                                                                                  | Mountain huts                                                                                                                                                                                                                     | Representation of mountain huts                                                                                                                                                      | _Multi-functional enhancement of active huts (e.g. creation or empowerment of pedestrian trails, connections with valley floors, management of water resources)<br>_Multi-functional enhancement of abandoned or underused huts (e.g. refurbishment and reuse as mountain shelters)<br>Preservation and renovation of huts in accordance with traditional shapes and materials<br>_Preservation and<br>_Preservation and restoration of the surroundings of mountain huts (paths, stone walls, water streams, pits...)<br>_Startup of policies to promote typical mountain products based on pastures and huts                                                                                                           |
|              | KT1d_Preserving the features representing the identity of the anthropic landscape | Valley floor historical urban settlements to be restored, enhanced or preserved                                                                                                                                                                                                                                                                                                               | Historical urban settlements                                                                                                                                                                                                      | Selection of historical urban settlements located on valley floors                                                                                                                   | _Recovery and reuse of building heritage preserving traditional building types and materials<br>_Redevelopment of public spaces system (streets, squares...) to promote pedestrian usage and tourism<br>_Connections between urban settlements and open spaces (access to waterways, links with mountain paths)<br>_Vacant retail stores mapping and incentives to temporary reuse of vacant spaces)<br>_Improvement of connections with the main recreational paths (e.g. Adda Greenway) with the creation of areas equipped to host activities for visitors and territorial promotion<br>_Improvement of public transport networks                                                                                     |
|              |                                                                                   | Slope historical urban settlements to be restored, enhanced or preserved                                                                                                                                                                                                                                                                                                                      | Historical urban settlements                                                                                                                                                                                                      | Selection of historical urban settlements located on slopes                                                                                                                          | _Recovery and reuse of building heritage (including reuse as scattered hotels or agritourism) preserving traditional building types and materials<br>_Preservation and reinforcement of the connections with valley floors (e.g. road maintenance, improvement of public transport, enhancement of paths<br>_Promotion of trails connecting historical villages with cultural heritage sites along mountain slopes<br>_Economic policies in support of local productions and landscape promotion<br>_Startup of open-air cultural events and exhibitions along historical settlements and their surroundings<br>_Improvement of digital telecommunication networks                                                       |

|  |                                                                                                  |                                        |                                                                                  |                                                                                                                                                                                                                                                                              |
|--|--------------------------------------------------------------------------------------------------|----------------------------------------|----------------------------------------------------------------------------------|------------------------------------------------------------------------------------------------------------------------------------------------------------------------------------------------------------------------------------------------------------------------------|
|  | Historical and cultural heritage sites to be preserved                                           | Historical and cultural heritage sites | Representation of historical and cultural heritage sites as points               | _Creation of widespread thematic trails, involving interventions on public spaces and signage systems<br>_Cultural enhancement of historical industrial sites, power plants or mines<br>_Reinforcement of cycle paths and tracks and of their connections with Adda Greenway |
|  | Historical and cultural heritage clusters to be preserved                                        | Historical and cultural heritage sites | Representation of historical and cultural heritage high density units, as points |                                                                                                                                                                                                                                                                              |
|  | Aggregations of buildings and areas with significant landscape quality (RLP Discipline, Art. 23) | RLP                                    | Same representation as RLP                                                       | _Detailed recommendation and actions reported in the Aggregations sheets of the RLP                                                                                                                                                                                          |
|  | UNESCO World Heritage Sites (RLP Discipline, Art. 37)                                            | RLP                                    | Same representation as RLP                                                       | _Creation of networks to connect UNESCO sites with the surrounding local heritage system                                                                                                                                                                                     |

| Key topics          | Thematic objectives                                                                                            | Strategic priority areas                                                      | Spatial data and sources                                                                                                                           | Selection and representation criteria                                                                                                                                                                                                                                  | Design solutions                                                                                                                                                                                                                                                                                                                                                                                                                                                              |
|---------------------|----------------------------------------------------------------------------------------------------------------|-------------------------------------------------------------------------------|----------------------------------------------------------------------------------------------------------------------------------------------------|------------------------------------------------------------------------------------------------------------------------------------------------------------------------------------------------------------------------------------------------------------------------|-------------------------------------------------------------------------------------------------------------------------------------------------------------------------------------------------------------------------------------------------------------------------------------------------------------------------------------------------------------------------------------------------------------------------------------------------------------------------------|
| KT2_Natural Capital |                                                                                                                | Regional Ecological Network (REN) primary corridors                           | REN                                                                                                                                                | REN primary corridors                                                                                                                                                                                                                                                  | _Improvement of ecological connections through reforestation and reinstatement of shrubs<br>_Creation of wildlife crossings to overstep infrastructures<br>_Increase of ecological values in rural areas through conservation agriculture systems<br>_Maintenance of riparian areas with cleaning or replacement of decayed plants                                                                                                                                            |
|                     |                                                                                                                | REN passages                                                                  | REN                                                                                                                                                | REN passages                                                                                                                                                                                                                                                           | _Creation of tree rows on and green buffer zones on urban edges<br>_Greening interventions on permeable areas<br>_Creation of green bridges and wildlife crossings to overstep infrastructures                                                                                                                                                                                                                                                                                |
|                     |                                                                                                                | Landscape enhancement connections from RGI with mainly environmental purposes | RGI                                                                                                                                                | Selection of landscape enhancement connections from RGI with mainly environmental purposes                                                                                                                                                                             | _Riparian vegetation maintenance and renovation with cleaning or replacement of decayed plants<br>_Reinstatement and increase of riparian vegetation with tree rows and shrubs<br>_Reinstatement of flood plains by moving embankments back or reshaping river banks<br>_Preservation and recovery of croplands, where possible with conservation agriculture systems                                                                                                         |
|                     |                                                                                                                | Priority revitalization areas for damaged woodland ecosystems:                | Regional LULC map; map of woods damaged by windstorms and beetle outbreaks; map of wildfire ignition points from regional wildfire prevention plan | classification of damaged woodlands by damage cause; representation with point symbols                                                                                                                                                                                 |                                                                                                                                                                                                                                                                                                                                                                                                                                                                               |
|                     | KT2a_Promoting maintenance, reinforcement or reinstatement of ecological connectivity and high habitat quality | 1. revitalization areas of woodland ecosystem damaged by windstorms;          |                                                                                                                                                    |                                                                                                                                                                                                                                                                        | _Definition of priority criteria to reinstate vegetation, depending on the main function of damaged woodlands<br>_Creation of temporary structures to prevent rockfalls and hydrogeological instability<br>_Interventions to protect newly planted trees from attacks by wildlife<br>_Diversification of species chosen for reforestation, in order to reduce vulnerability<br>_Recovery of damaged woodland management infrastructures and pastures                          |
|                     |                                                                                                                | 2. revitalization areas of woodland ecosystem damaged by wildfires;           |                                                                                                                                                    |                                                                                                                                                                                                                                                                        | _Seeding of local herbaceous plants to prevent the removal of fertilizing ashes caused by runoff<br>_Safeguard of slopes with temporary canal systems<br>_Cutting of partially burnt plants with extensive damages<br>_Concealment of areas hit by fire with wooded buffer zones<br>_Reforestation by site-specific and suitable wood species, in accordance to the main functions of lost woodlands<br>_Recovery of damaged woodland management infrastructures and pastures |
|                     |                                                                                                                | 3. revitalization areas of woodland ecosystem damaged by beetle outbreaks     |                                                                                                                                                    |                                                                                                                                                                                                                                                                        | _Supervision of the infestation through traps and satellite images<br>_Supervised cutting of infested plants, prioritizing woodlands with a protection function<br>_Stabilization of involved slopes with light soil bioengineering methods<br>_Pest control with the use of bait to attract the insects<br>_Arrangement of monitoring and early warning systems in case of fall of infested plants                                                                           |
|                     |                                                                                                                | Peri-urban rural areas to be preserved:                                       | Regional LULC map; Regional map of mobility infrastructures; RGI                                                                                   | Detection of peri-urban rural areas with significant risk of encirclement by urbanized areas and infrastructures (more than half of their perimeter is encircled); Selection of risk areas within RGI; classification by environmental, historical and cultural values |                                                                                                                                                                                                                                                                                                                                                                                                                                                                               |
|                     |                                                                                                                | 1. areas with high environmental values;                                      |                                                                                                                                                    |                                                                                                                                                                                                                                                                        | _Creation of allotments with local vegetation species<br>_Introduction of rural products in local supply chains<br>_Increase of natural values by planting new scrub and bushes<br>_Creation of green bridges and wildlife crossings to overstep infrastructures<br>_Creation of green buffer zones next to settlements and infrastructures                                                                                                                                   |
|                     |                                                                                                                | 2. areas with high historical and cultural values;                            |                                                                                                                                                    |                                                                                                                                                                                                                                                                        | _Creation of public green areas and pocket parks, enhancing cycle and pedestrian accessibility<br>_Creation of green buffer zones next to settlements and infrastructures<br>_Reuse of near buildings as low-impact facilities in support to recreation<br>_Introduction of rural products in local supply chains<br>_Creation of green bridges and wildlife crossings to overstep infrastructures                                                                            |
|                     |                                                                                                                | 3. areas with high environmental, historical and cultural values              |                                                                                                                                                    |                                                                                                                                                                                                                                                                        | _Actions refer to both previous categories                                                                                                                                                                                                                                                                                                                                                                                                                                    |
|                     | KT2b_Promoting reorganization and defragmentation of peri- urban landscapes tackling loss of biodiversity      |                                                                               |                                                                                                                                                    |                                                                                                                                                                                                                                                                        |                                                                                                                                                                                                                                                                                                                                                                                                                                                                               |

|  |                                                                           |                                                                                                                                     |                                          |                                                                                                                     |                                                                                                                                                                                                                                                                                                                                                                                                                                                                                                                                                            |
|--|---------------------------------------------------------------------------|-------------------------------------------------------------------------------------------------------------------------------------|------------------------------------------|---------------------------------------------------------------------------------------------------------------------|------------------------------------------------------------------------------------------------------------------------------------------------------------------------------------------------------------------------------------------------------------------------------------------------------------------------------------------------------------------------------------------------------------------------------------------------------------------------------------------------------------------------------------------------------------|
|  |                                                                           | Priority areas where to tackle linear conurbation trends                                                                            | Regional LULC maps                       | Linear conurbation trends detected from analysis of land use changes between 1999 and 2018                          | <ul style="list-style-type: none"> <li>_Green buffer zones and tree rows on urban edges</li> <li>_Greening leftover permeable spaces with a variety of local plant species</li> <li>_Adoption of planning strategies aiming at reduce urban sprawl and preserve rural land</li> <li>_Creation of integrated green buffer zones on new urban projects</li> <li>_Incentives to the reuse of abandoned structures to tackle land take</li> </ul>                                                                                                              |
|  | KT2c_ Limiting, containing and mitigating impacts of anthropic activities | Areas involved in mining activities whose impacts should be limited and mitigated                                                   | Provincial quarries management plan; RGI | Selection of mining areas next to RGI                                                                               | <ul style="list-style-type: none"> <li>_Mitigation of visual impact through wooded buffer zones</li> <li>_Mitigation of acoustic impact with noise barriers</li> <li>_Use of constructed wetlands or aerated lagoons for wastewater treatment</li> <li>_Diversification of quarries recovery depending on the morphology and slope of quarries</li> <li>_Renaturalization of exhausted quarries with local plant species</li> <li>_Rural reuse of exhausted quarries with suitable crops</li> <li>_Creation of quarry lakes with local habitats</li> </ul> |
|  |                                                                           | Hydroelectric power plants and electrical power lines whose impacts should be limited and mitigated                                 | Provincial LULC map                      | Representation of hydroelectric power plants and electrical power lines                                             | <ul style="list-style-type: none"> <li>_Mitigation of visual impact through wooded buffer zones</li> <li>_Mitigation of acoustic impact with noise barriers</li> <li>_Refurbishment with suitable colours and materials</li> <li>_Where it is possible, placement of underground power lines in high quality landscapes</li> <li>_Appropriate placement of transmission towers in relation to major visual axes</li> <li>_Placement of bird deterrents on wires</li> </ul>                                                                                 |
|  |                                                                           | Industrial or commercial settlements and accommodation facilities whose landscape and environmental suitability should be increased | Regional LULC map; RGI                   | Industrial or commercial settlements and accommodation facilities next to RGI whose area is greater than 50.000 sqm | <ul style="list-style-type: none"> <li>_Mitigation of visual impact through wooded buffer zones</li> <li>_Increase of environmental quality through greening of open spaces and reduction of impervious pavings</li> <li>_Increase of permeability through permeable paving, green roofs and green walls</li> <li>_Increase of energy efficiency through solar power or passive solutions</li> <li>_Refurbishment with suitable colours and materials</li> </ul>                                                                                           |
|  |                                                                           | Ski resorts to be involved in integrated redevelopment strategies                                                                   | RTAP MAV                                 | Representation of ski resorts to be involved in integrated redevelopment strategies according to RTAP MAV           | <ul style="list-style-type: none"> <li>_Recognition of areas for nordic skiing</li> <li>_Promotion of sustainable complementary activities (unpaved tracks, helisking, snowcats)</li> <li>_Seasonal interventions to promote the use of pistes during spring and summer</li> <li>_Safeguard of tracks with light bioengineering methods</li> </ul>                                                                                                                                                                                                         |
|  |                                                                           | Landscape mitigation and integration buffers for new infrastructures from RGI                                                       | RGI                                      | Landscape mitigation and integration buffers for new infrastructures from RGI                                       | <ul style="list-style-type: none"> <li>_Creation of buffer tree rows</li> <li>_Reduction of noise pollution through noise barriers next to urban areas</li> <li>_Creation of compatible croplands along edges and curves</li> <li>_Design of high quality bridges and viaducts</li> <li>_Design and management of intersections with cycle and pedestrian paths</li> <li>_Creation of green bridges and wildlife crossings</li> </ul>                                                                                                                      |

| Key topics                  | Thematic objectives                                                                                                          | Strategic priority areas                                                     | Spatial data and sources                                     | Selection and representation criteria                                                                                            | Design solutions                                                                                                                                                                                                                                                                                                                                                                                                                                                                                                                                                     |
|-----------------------------|------------------------------------------------------------------------------------------------------------------------------|------------------------------------------------------------------------------|--------------------------------------------------------------|----------------------------------------------------------------------------------------------------------------------------------|----------------------------------------------------------------------------------------------------------------------------------------------------------------------------------------------------------------------------------------------------------------------------------------------------------------------------------------------------------------------------------------------------------------------------------------------------------------------------------------------------------------------------------------------------------------------|
| KT3_ Sustainable Recreation | KT3a_ Promoting sustainable recreation in natural heritage, also through soft mobility networks and landscape connections    | Local trail network sections to be improved and enhanced                     | Map of regional trail network; hiking circuits from RTAP MAV | Selection of trail sections included in supra- local hiking circuits planned by RTAP MAV                                         | <ul style="list-style-type: none"> <li>_Maintenance and securing interventions for paths</li> <li>_Preservation of viewpoints and outlooks through land use restrictions, signage and billboard control</li> <li>_Reuse and refurbishment of abandoned structures along paths for recreational purposes</li> <li>_Connections with the Adda Greenway and with public transport stops</li> <li>_Creation of a corporate visual identity for signage</li> </ul>                                                                                                        |
|                             |                                                                                                                              | Landscape enhancement connections from RGI with mainly recreational purposes | RGI                                                          | Selection of landscape enhancement connections from RGI with mainly environmental purposes                                       | <ul style="list-style-type: none"> <li>_Maintenance and reinforcement of path continuity</li> <li>_Safeguard and enhancement of panoramic viewpoints through land use restrictions and signage control</li> </ul>                                                                                                                                                                                                                                                                                                                                                    |
|                             |                                                                                                                              | Landscape connection projects from RGI with mainly recreational purposes     | RGI                                                          | Selection of landscape enhancement connections from RGI with mainly recreational purposes                                        | <ul style="list-style-type: none"> <li>_Maintenance and reinforcement of path continuity</li> <li>_Safeguard and enhancement of panoramic viewpoints through land use restrictions, signage and billboard control</li> </ul>                                                                                                                                                                                                                                                                                                                                         |
|                             |                                                                                                                              | Sustainable recreational enhancement of "Landscapes of Silence"              | RTAP MAV                                                     | "Landscapes of Silence", established by RTAP MAV as highly natural areas to be involved in sustainable tourism development       | <ul style="list-style-type: none"> <li>_Maintenance and reinforcement of hiking trails</li> <li>_Integration of huts, shelters, agritourisms in recreation networks</li> <li>_Restoration or maintenance of architectural heritage</li> </ul>                                                                                                                                                                                                                                                                                                                        |
|                             |                                                                                                                              | Environmental systems to be enhanced, redeveloped and restored               | RTAP MAV                                                     | Representation of landscape enhancement, redevelopment and restoration areas from RTAP MAV with primarily environmental features | <ul style="list-style-type: none"> <li>_Creation and improvement of trails connecting natural systems</li> <li>_Reinstatement of the natural course of the Adda river and environmental recovery in val Pola, damaged by a landslide</li> <li>_Enhancement of trails, huts, shelters in areas to qualify as Silence landscapes</li> <li>_Interventions on healthcare complexes to be restored and renovated (Morelli sanatorium, in the town of Sondalo), with recreational enhancement of surrounding open spaces and connections with the Adda Greenway</li> </ul> |
|                             | KT3b_ Supporting traditional and quality supply chains in farming, forestry and dairy products as multifunctional activities | Priority multi-function enhancement areas: mountain pastures                 | Map of mountain pastures; RGI                                | Selection of mountain pastures within RGI                                                                                        | <ul style="list-style-type: none"> <li>_Improvement of cycle and pedestrian paths which pass through pastures</li> <li>_Supervised trimming and deforestation interventions in pastures endangered by forest regrowth</li> <li>_Integration of huts and pastures in promotion networks for local dairy productions</li> </ul>                                                                                                                                                                                                                                        |
|                             |                                                                                                                              | Priority multi-function enhancement areas: wine production                   | DOC and DOCG wine production zones                           | Representation of DOC and DOCG wine production zones in the study area                                                           | <ul style="list-style-type: none"> <li>_Incentives to vineyard development rather than other land uses</li> <li>_Settlements with private owners to promote accessibility of rural paths</li> <li>_Maintenance and enhancement interventions for terraced landscapes</li> <li>_Territorial promotion of local wine companies, also through public events</li> </ul>                                                                                                                                                                                                  |
|                             |                                                                                                                              | Priority multi-function enhancement areas: typical dairy production          | Map of production sites of PDO local cheeses                 | Representation of mountain huts where PDO cheeses are officially produced                                                        | <ul style="list-style-type: none"> <li>_Integration of local productions in tourist supply chains</li> <li>_Usage of local productions in short supply chains</li> <li>_Development of focused marketing strategies</li> <li>_Recreational and educational uses for huts involved in dairy production</li> </ul>                                                                                                                                                                                                                                                     |

|  |                                                                             |                                                                                                       |                                                     |                                                                                                                                        |                                                                                                                                                                                                                                                                                                                                                                                                                                                                                                                                                                  |
|--|-----------------------------------------------------------------------------|-------------------------------------------------------------------------------------------------------|-----------------------------------------------------|----------------------------------------------------------------------------------------------------------------------------------------|------------------------------------------------------------------------------------------------------------------------------------------------------------------------------------------------------------------------------------------------------------------------------------------------------------------------------------------------------------------------------------------------------------------------------------------------------------------------------------------------------------------------------------------------------------------|
|  |                                                                             | Priority multi-function enhancement areas: apple orchards                                             | Regional LULC map                                   | Simplified representation of apple orchards, where PGI apple varieties are produced                                                    | <ul style="list-style-type: none"> <li>_Incentives to vineyard development rather than other land uses</li> <li>_Settlements with private owners to promote accessibility of rural paths</li> <li>_Integration of local productions in tourist supply chains</li> <li>_Usage of local productions in short supply chains</li> </ul>                                                                                                                                                                                                                              |
|  |                                                                             | Priority multi-function enhancement areas: historical cereal production                               | Historical and tourist local maps                   | Representation of the "Mill Valley", the historical core of cereal production in the study area                                        | <ul style="list-style-type: none"> <li>_Incentives to restoration and opening of mills</li> <li>_Promotion of educational events on site concerning historical local cereal production</li> </ul>                                                                                                                                                                                                                                                                                                                                                                |
|  | KT3c_Promoting and enhancing recreation in historical and cultural heritage | Structural soft mobility elements whose connections with local cycle path network should be increased | RTAP MAV                                            | Adda river Greenway, established from RTAP MAV                                                                                         | <ul style="list-style-type: none"> <li>_Creation of permeable junctions between Adda Greenway and local paths</li> <li>_Prioritizing connections to enhance accessibility to environmental and heritage systems</li> <li>_Separation between cycle and pedestrian crossings along crossroads</li> <li>_Startup of bike sharing systems and intermodal connections in urban areas</li> <li>_Creation of a corporate visual identity for signage</li> </ul>                                                                                                        |
|  |                                                                             | Historical and cultural systems to be enhanced, redeveloped and restored                              | RTAP MAV                                            | Representation of landscape enhancement, redevelopment and restoration areas from RTAP with primarily historical and cultural features | <ul style="list-style-type: none"> <li>_Creation of connection trails between cultural heritage systems</li> <li>_Linking trails with the Adda Greenway</li> <li>_Promotion of focused strategies for opening private heritage assets to the public</li> <li>_Financial incentives to restoration and maintenance of private assets</li> <li>_Creation of a corporate visual identity for signage</li> <li>_Promotion of educational events and activities for students</li> </ul>                                                                               |
|  | KT3d_Exploring and promoting alternative tourism and recreation             | Attention and mitigation areas linked to possible functionality loss of low altitude ski resorts      | RTAP MAV; Digital Terrain Model with 5 m resolution | Selection of ski resorts and cross-country tracks more than 40% of whose area is located below 1650 m                                  | <ul style="list-style-type: none"> <li>_Conversion to integrate recreational activities (MTB, snowshoes, hiking trails...)</li> <li>_Renaturalization and recreational enhancement of pistes</li> <li>_Creation of tanks and basins to improve management of water resources used for snowmaking</li> <li>_Implementation of integrate weather databases to monitor multi-year variations in snowing</li> </ul>                                                                                                                                                  |
|  |                                                                             | Attention and mitigation areas linked to overtourism impacts                                          | Statistical data on tourism                         | Punctual symbols on municipalities affected by significant overtourism impacts                                                         | <ul style="list-style-type: none"> <li>_Good practices for energy efficiency of accommodation facilities (e.g. use of solar power and bioenergy)</li> <li>_Sustainable refurbishment of mountain shelters with improvement of energy efficiency</li> <li>_Promotion of alternative winter activities (MTB, snowshoes, hiking trails...)</li> <li>_Promotion of tourism and recreational events outside winter season (e.g. food and wine or wellness tourism)</li> <li>_Multi-scale planning for public transport, including transfers to ski resorts</li> </ul> |
|  |                                                                             | Areas substantially depending on winter tourism                                                       | Statistical data on tourism                         | Punctual symbols on municipalities considerably depending on winter tourism activities                                                 | <ul style="list-style-type: none"> <li>_Conversion to integrate recreational activities (MTB, snowshoes, hiking trails...)</li> <li>_Renaturalization of abandoned or underused pistes and surrounding spaces</li> <li>_Promotion of tourism and recreational events outside winter season (e.g. food and wine or wellness tourism)</li> </ul>                                                                                                                                                                                                                   |
